# Supplementary material
Source: MDPI journal article supplement (https://www.mdpi.com/2073-445X/12/10/1923)
Supplement: s1 [file s1]

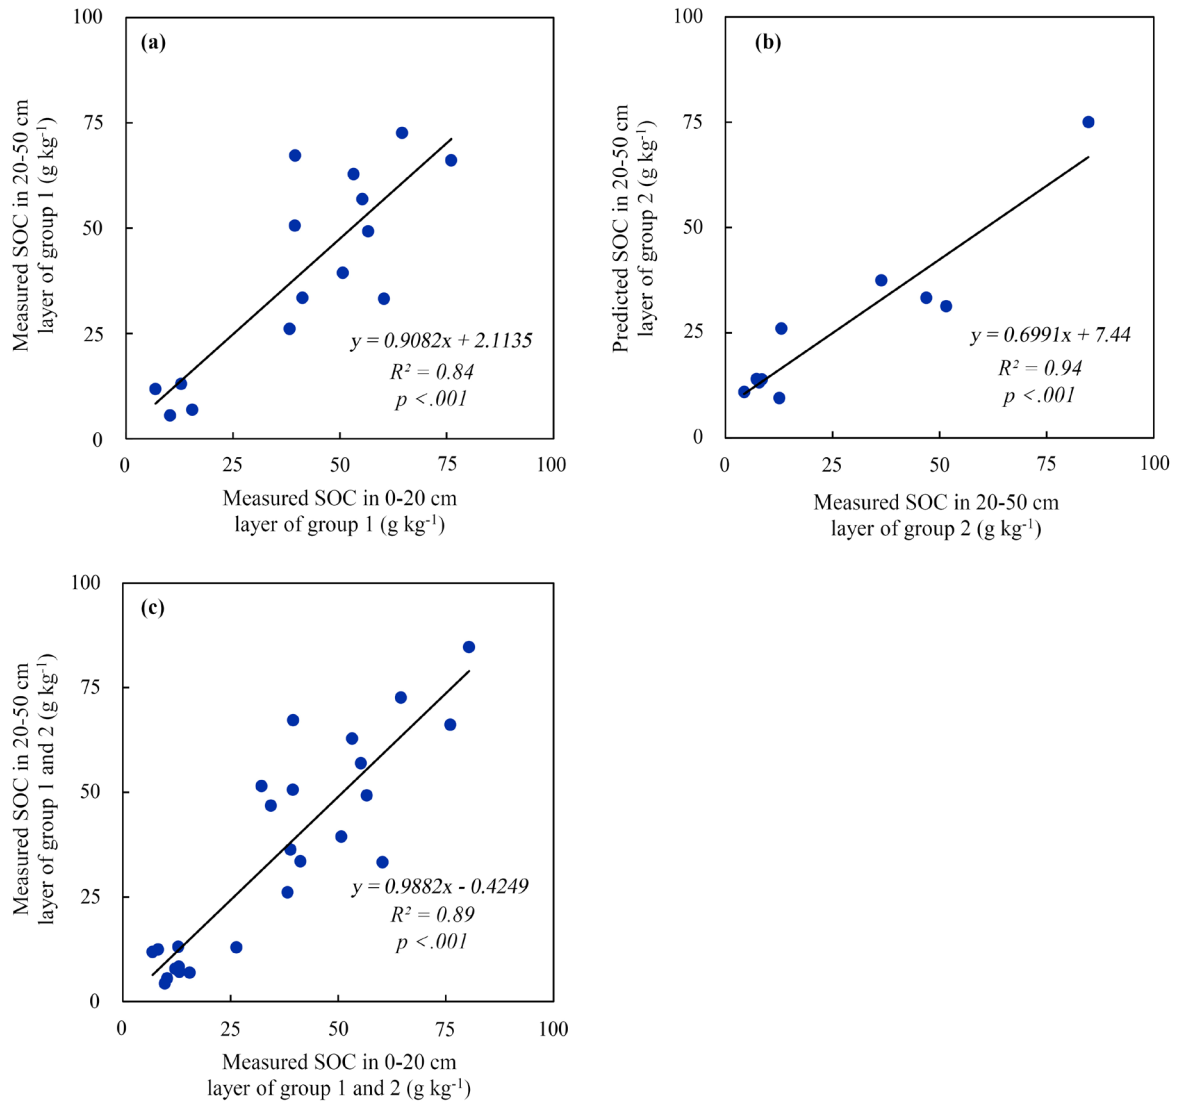

**Figure S1.** Relationships between measured SOC content in 0-20 cm layer and measured SOC content in 20-50 cm layer of group 1 (a), between measured SOC content in 20-50 cm layer and predicted SOC content in 20-50 cm layer of group 2 (b), between measured SOC content in 0-20 cm layer and measured SOC content in 20-50 cm layer of group 1 and 2 (c).

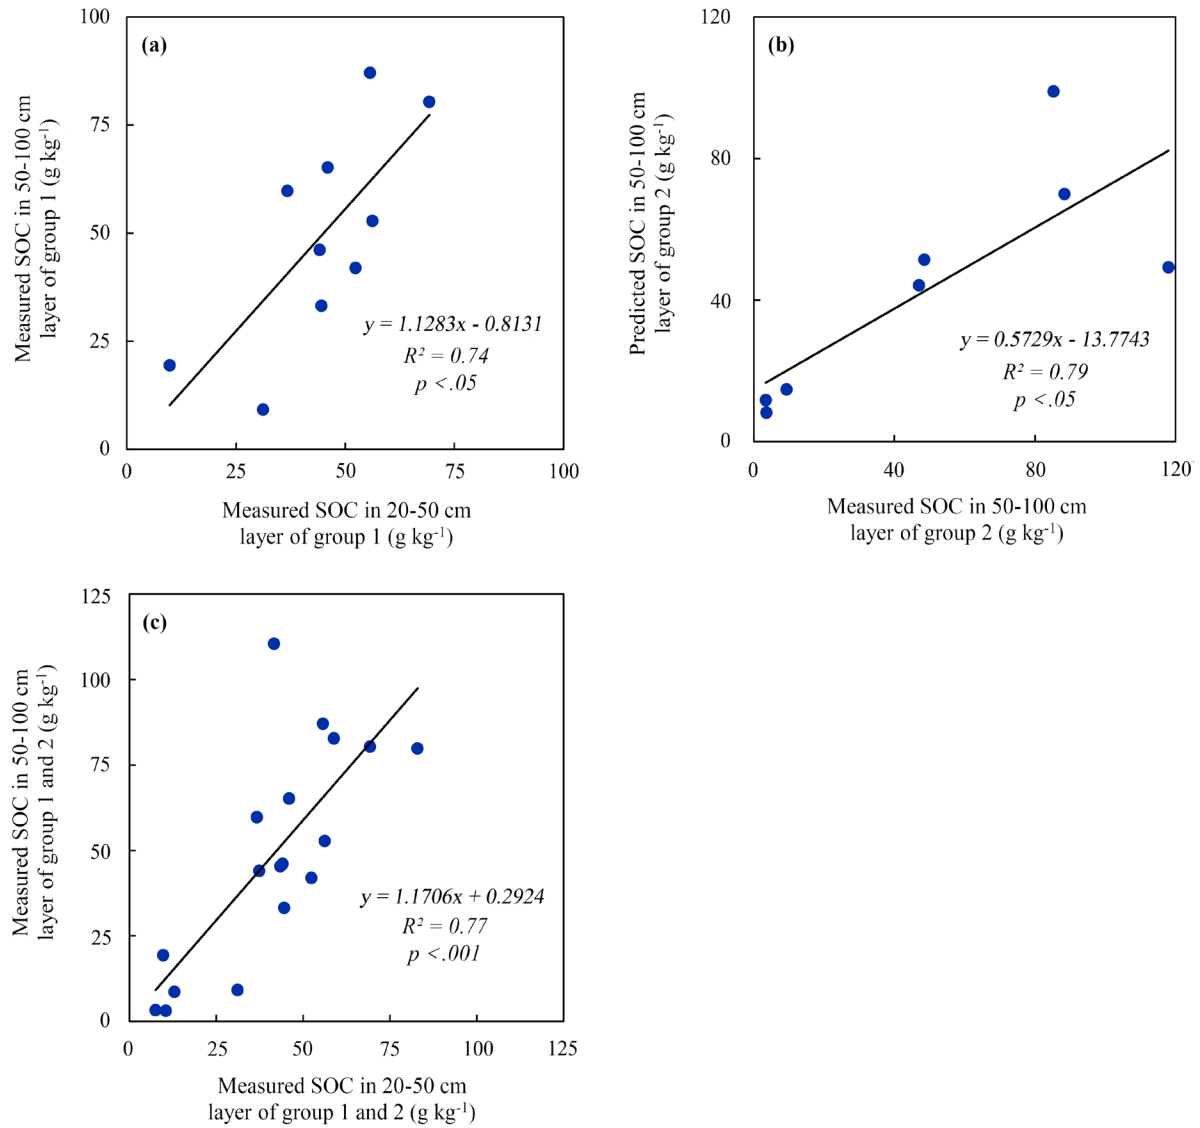

**Figure S2.** Relationships between measured SOC content in 20-50 cm layer and measured SOC content in 50-100 cm layer of group 1 (a), between measured SOC content in 50-100 cm layer and predicted SOC content in 50-100 cm layer of group 2 (b), between measured SOC content in 20-50 cm layer and measured SOC content in 50-100 cm layer of group 1 and 2 (c).

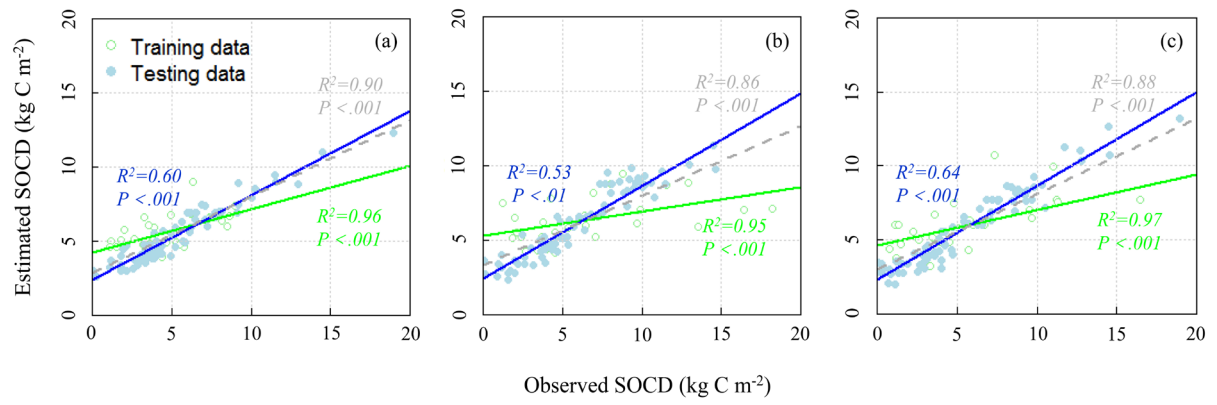

**Figure S3.** Comparison between estimated and observed SOC at the training and testing phases in the three soil layers. (a) , (b) and (c) are samples in the 0-20 cm, 20-50 cm and 50-100 cm soil layers. The blue line shows the performance of the model in the training samples and the lightgreen one indicates that in the testing samples. The grey dashed line shows the prediction accuracy of the model compared to all measurements, including training and testing samples.  $R^2$ , coefficient of determination.

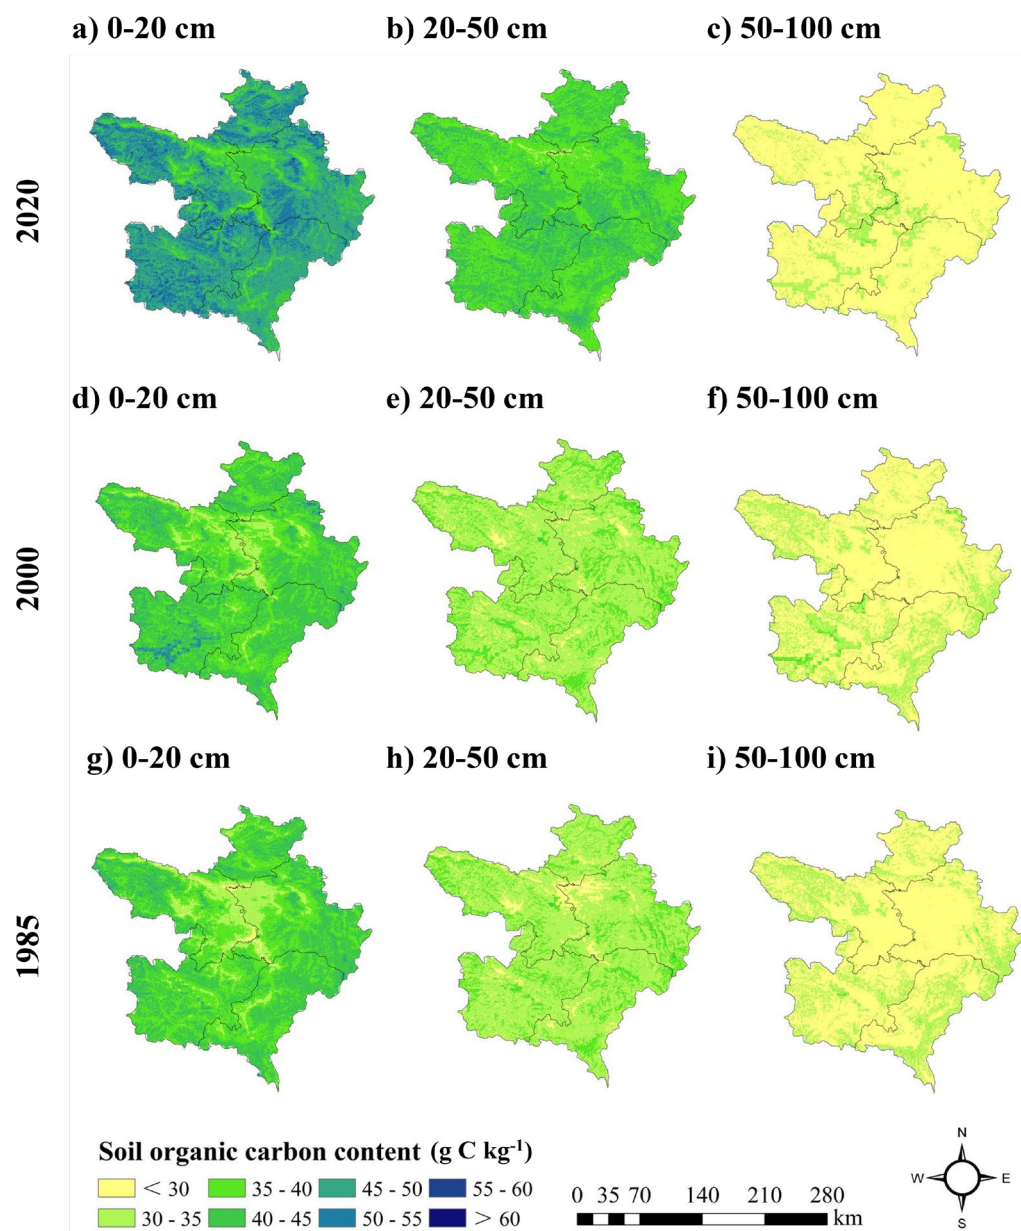

**Figure S4.** Spatial distribution of SOC content in each soil layer of Zoige wetland during 1985-2020.

a) Between 2000 and 1985

b) Between 2020 and 2000

c) Between 2020 and 1985

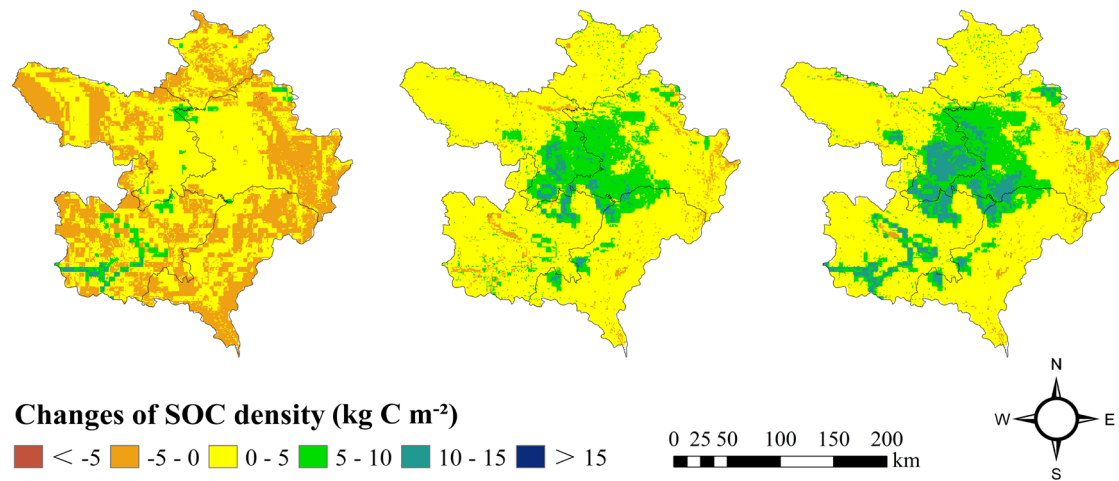

**Figure S5.** Spatial distribution of SOC density changes across the Zoige wetland area during 1985-2020.

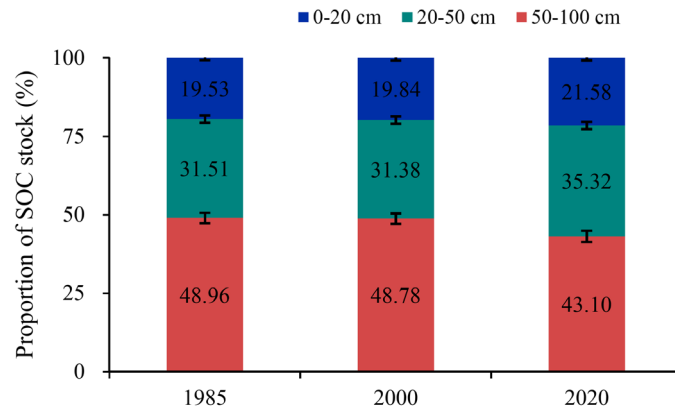

**Figure S6.** Distribution of soil organic carbon stocks in different soil layers in Zoige wetland during 1985-2020. The values in the figure are the mean values of the percentage of soil organic carbon allocation for the whole region, and the error line represents the standard deviation.

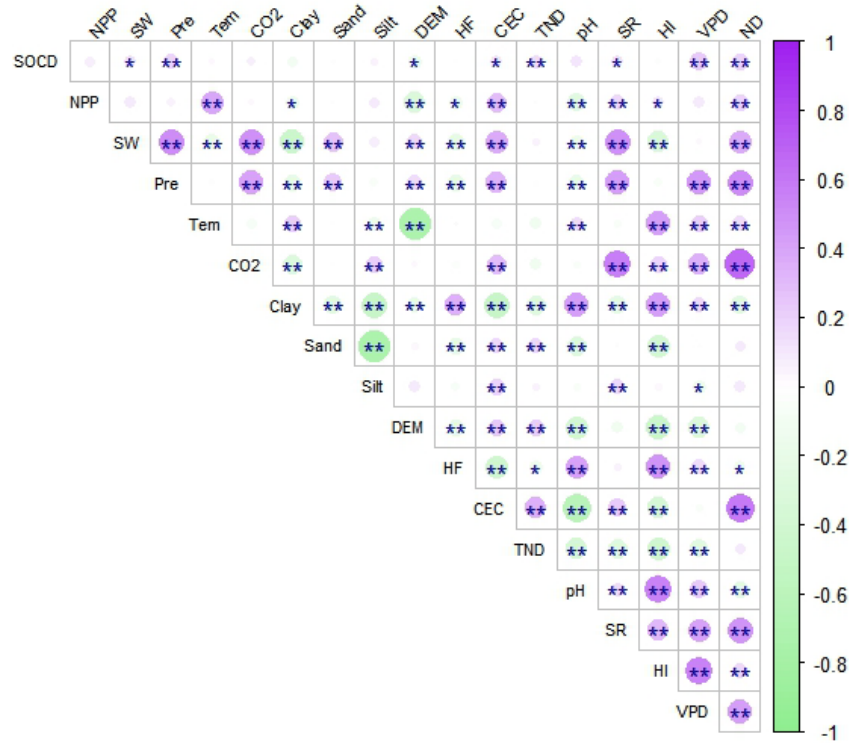

**Figure S7.** Pearson correlations between control variables and SOC density in Zoige wetland. Abbreviations: SOCD, soil organic carbon density; NPP, net primary productivity; SW, soil water; Pre, precipitation; Tem, temperature; CO<sub>2</sub>, CO<sub>2</sub> fertilization; HF, Human footprint; TND, total nitrogen density; SR, solar radiation; HI, humidity index; VPD, vapor pressure deficit. \* represents  $P < 0.05$ , \*\* represents  $P < 0.01$ .

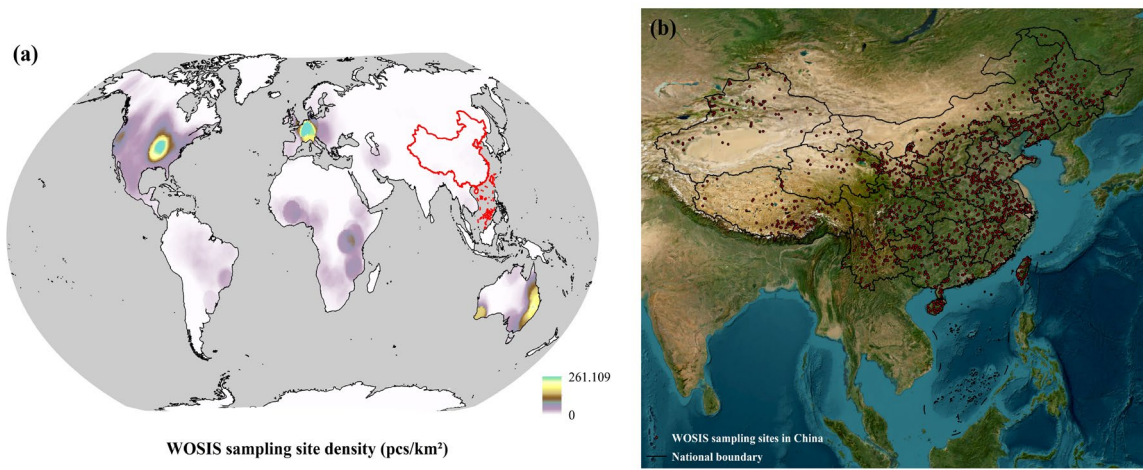

**Figure S8.** Point density analysis of WOSIS global sampling points (a) and the distribution of WOSIS sampling points in China (b).

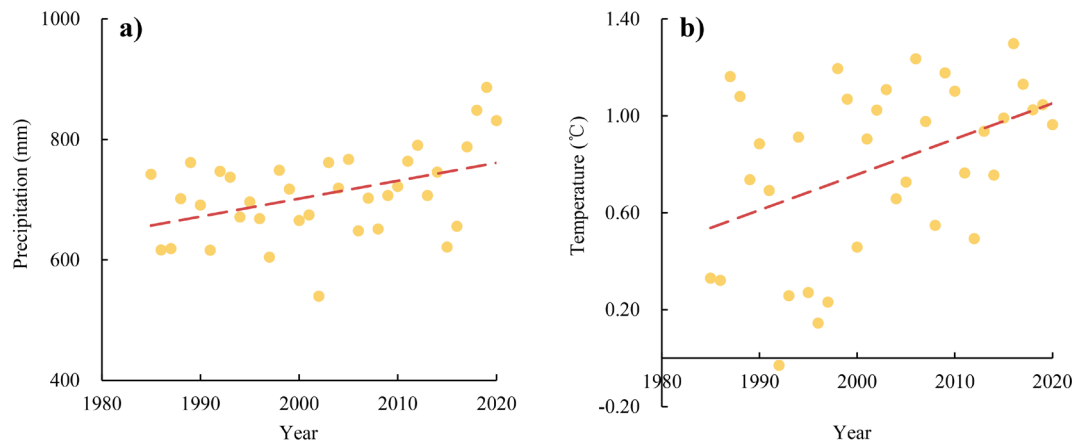

**Figure S9.** Annual precipitation (a) and average annual temperature (b) of the Zoige wetland from 1985 to 2020. The red dashed line is the trend line of the scattered points.

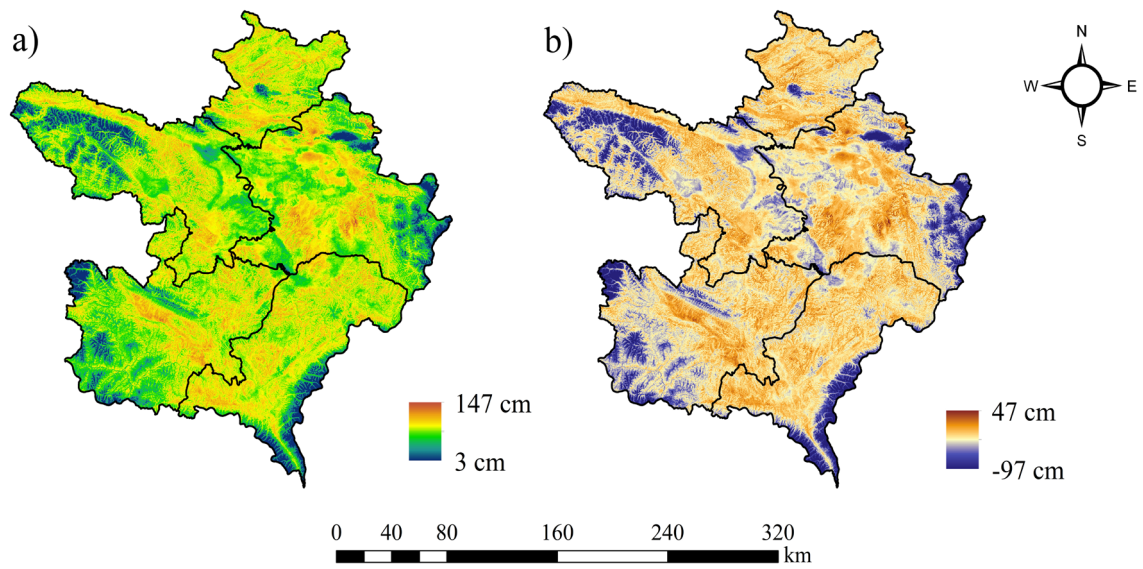

**Figure S10.** Soil layer thickness (a) and difference with 1m deep soil (b) in Zoige wetland. The brown area in (b) represents the soil layer thickness greater than 1m, and the purple area represents the soil layer thickness less than 1m.

**Table S1.** Comparison of GSCC soil types appearing in the manuscript with ST classifications.

| GSCC classification   | ST classification |
|-----------------------|-------------------|
| brown earths          | Alfisols          |
| dark-brown earths     | Alfisols          |
| cinnamon soils        | Alfisols          |
| gray-cinnamon soils   | Alfisols          |
| chernozems            | Mollisols         |
| skeletal soils        | Entisols          |
| meadow soils          | Inceptisols       |
| mountain meadow soils | Inceptisols       |
| bog soils             | Histosols         |
| peat soils            | Histosols         |
| felty soils           | Inceptisols       |
| dark felty soils      | Inceptisols       |
| frigid frozen soils   | Entisols          |

**Table S2.** Variables used in the modelling of changes in soil carbon.

| Variable              | Features                                                      | Unit                  | Resolutions  | Resources          |
|-----------------------|---------------------------------------------------------------|-----------------------|--------------|--------------------|
| Soil properties       | Clay content                                                  | %                     | 1:1 million  | RESDC              |
|                       | Silt content                                                  | %                     |              |                    |
|                       | Sand content                                                  | %                     |              |                    |
|                       | pH                                                            | -                     | 90 m         | NESSDC             |
|                       | CEC                                                           | cmol(+)/kg            |              |                    |
|                       | TN density                                                    | kg/m <sup>2</sup>     |              |                    |
| Climate variables     | Temperature                                                   | °C                    | 1 km         | Peng et al. (2019) |
|                       | Precipitation                                                 | mm                    |              |                    |
|                       | Humidity index (P/PET)                                        | -                     |              |                    |
|                       | Soil water                                                    | %                     | 4 km         | TerraClimate       |
|                       | Vapor pressure deficit                                        | kPa                   |              |                    |
|                       | Solar radiation                                               | W/m <sup>2</sup>      |              |                    |
| Environment variables | DEM                                                           | m                     | 30 m         | GDEMv3             |
|                       | Net primary productivity                                      | g/m <sup>2</sup> /day | 500 m        | MOD17A2H           |
|                       | CO <sub>2</sub> fertilization                                 | ppmv                  | 1.9° × 3.75° | CAMS-GLOB GHG      |
|                       | Nitrogen deposition<br>(NH <sub>x</sub> and NO <sub>y</sub> ) | g/m <sup>2</sup> /yr  | 0.5°         | NACP               |
|                       |                                                               |                       |              |                    |
| Human factors         | Human footprint                                               | -                     | 1 km         | Mu et al., (2022)  |

**Table S3.** Descriptive statistics of SOCD and other Variables in our dataset.

| Variable        | Unit                  | Max    | Min    | Mean   | Median | SD    | CV    |
|-----------------|-----------------------|--------|--------|--------|--------|-------|-------|
| SOCD            | kg C m <sup>-2</sup>  | 171.0  | 1.9    | 33.8   | 26.5   | 31.0  | 30.6  |
| Clay            | %                     | 29.0   | 8.0    | 21.2   | 20.0   | 4.3   | 20.5  |
| Silt            | %                     | 49.0   | 12.0   | 32.8   | 30.0   | 6.2   | 18.7  |
| Sand            | %                     | 80.0   | 29.0   | 46.0   | 45.0   | 5.5   | 12.0  |
| Tem             | °C                    | 7.9    | 0.1    | 2.6    | 2.4    | 1.0   | 37.2  |
| Pre             | mm                    | 910.0  | 529.4  | 692.1  | 694.5  | 72.5  | 10.5  |
| HI              | -                     | 704.6  | 470.7  | 620.5  | 631.4  | 41.8  | 6.7   |
| SW              | %                     | 98.5   | 50.4   | 75.8   | 74.9   | 11.4  | 15.0  |
| VPD             | kPa                   | 6.8    | 3.5    | 5.1    | 5.1    | 0.6   | 12.6  |
| SR              | W/m <sup>2</sup>      | 1679.7 | 144.5  | 340.2  | 161.6  | 492.6 | 144.8 |
| DEM             | m                     | 3996.0 | 2898.0 | 3480.4 | 3456.0 | 132.2 | 3.8   |
| NPP             | g/m <sup>2</sup> /day | 550.5  | 186.9  | 376.0  | 377.4  | 38.4  | 10.2  |
| CO <sub>2</sub> | ppmv                  | 4.4    | 3.6    | 4.1    | 4.2    | 0.2   | 4.8   |
| ND              | g/m <sup>2</sup> /yr  | 1562.9 | 773.8  | 1141.3 | 1187.1 | 219.2 | 19.2  |
| HF              | -                     | 30.2   | 2.7    | 12.9   | 13.4   | 5.3   | 41.4  |

SD, standard deviation; CV, coefficient of variation; SOCD, soil organic carbon density.

**Table S4.** Soil organic carbon density (kg C m<sup>-2</sup>) of different soil types in Zoige wetland.

| Soil type             | 2020       | 2000       | 1985       |
|-----------------------|------------|------------|------------|
| Brown earths          | 53.99±4.06 | 48.61±3.53 | 47.88±1.70 |
| Dark-brown earths     | 50.23±3.40 | 47.89±3.34 | 46.63±1.66 |
| Cinnamon soils        | 53.18±4.40 | 50.26±4.29 | 48.97±1.76 |
| Grey-cinnamon soils   | 54.34±4.53 | 52.49±5.67 | 47.62±2.32 |
| Chernozems            | 49.28±1.69 | 46.30±1.38 | 46.09±1.44 |
| Skeletol soils        | 47.70±0.45 | 46.67±0.76 | 47.71±1.12 |
| Meadow soils          | 51.48±3.93 | 47.54±3.04 | 46.42±2.33 |
| Mountain meadow soils | 47.74±0.90 | 46.21±1.33 | 46.51±1.39 |
| Bog soils             | 50.99±3.81 | 45.94±2.75 | 45.15±1.86 |
| Peat soils            | 51.89±3.90 | 46.42±2.11 | 45.49±1.41 |
| Felty soils           | 48.54±1.01 | 45.54±1.04 | 45.72±1.02 |
| Dark felty soils      | 48.74±2.78 | 45.14±2.34 | 44.84±1.58 |
| Frigid frozen soils   | 49.60±0.76 | 47.03±1.01 | 47.10±0.96 |

**Table S5.** Soil organic carbon density (kg C m<sup>-2</sup>) in each layer of different soil types in Zoige wetlands.

| Soil type             | 2020    |          |           |         | 2000     |           |         |          | 1985      |         |          |           |
|-----------------------|---------|----------|-----------|---------|----------|-----------|---------|----------|-----------|---------|----------|-----------|
|                       | 0-20 cm | 20-50 cm | 50-100 cm | 0-20 cm | 20-50 cm | 50-100 cm | 0-20 cm | 20-50 cm | 50-100 cm | 0-20 cm | 20-50 cm | 50-100 cm |
| Brown earths          | 10.99   | 18.20    | 21.47     | 9.87    | 15.57    | 23.17     | 9.61    | 15.53    | 22.74     |         |          |           |
| Dark-brown earths     | 11.01   | 17.78    | 21.44     | 9.69    | 15.14    | 23.06     | 9.29    | 14.86    | 22.47     |         |          |           |
| Cinnamon soils        | 11.45   | 18.92    | 22.81     | 10.06   | 16.23    | 23.97     | 9.61    | 15.96    | 23.39     |         |          |           |
| Grey-cinnamon soils   | 11.76   | 18.98    | 23.50     | 10.67   | 16.41    | 25.41     | 9.42    | 15.39    | 22.81     |         |          |           |
| Chernozems            | 10.77   | 17.46    | 21.05     | 9.04    | 14.57    | 22.73     | 8.76    | 14.39    | 22.95     |         |          |           |
| Skeletal soils        | 10.45   | 17.25    | 20.00     | 9.17    | 14.81    | 22.69     | 9.60    | 15.46    | 22.65     |         |          |           |
| Meadow soils          | 10.77   | 17.81    | 23.00     | 9.13    | 15.00    | 23.40     | 8.66    | 14.71    | 23.06     |         |          |           |
| Mountain meadow soils | 10.63   | 16.95    | 20.16     | 9.20    | 14.09    | 22.92     | 9.10    | 14.00    | 23.40     |         |          |           |
| Bog soils             | 11.12   | 18.08    | 21.80     | 9.31    | 14.86    | 21.77     | 9.00    | 14.60    | 21.55     |         |          |           |
| Peat soils            | 11.26   | 18.40    | 22.22     | 9.43    | 15.16    | 21.83     | 9.07    | 14.90    | 21.52     |         |          |           |
| Felty soils           | 10.12   | 16.77    | 21.65     | 8.64    | 13.92    | 22.98     | 8.63    | 13.97    | 23.12     |         |          |           |
| Dark felty soils      | 10.65   | 17.37    | 20.72     | 9.13    | 14.10    | 22.00     | 8.83    | 14.08    | 21.93     |         |          |           |
| Frigid frozen soils   | 10.72   | 17.37    | 21.54     | 9.33    | 14.39    | 23.31     | 9.17    | 14.55    | 23.39     |         |          |           |

**Table S6.** Proportion of soil organic carbon allocated to different soil types during 1985 to 2020.

| Soil type             | 2020         |              |              |              | 2000         |              |              |              | 1985         |         |          |           |
|-----------------------|--------------|--------------|--------------|--------------|--------------|--------------|--------------|--------------|--------------|---------|----------|-----------|
|                       | 0-20 cm      | 20-50 cm     | 50-100 cm    | 0-20 cm      | 20-50 cm     | 50-100 cm    | 0-20 cm      | 20-50 cm     | 50-100 cm    | 0-20 cm | 20-50 cm | 50-100 cm |
| Brown earths          | 21.69%±0.47% | 35.93%±0.99% | 42.38%±1.17% | 20.30%±0.66% | 32.03%±0.88% | 47.67%±1.09% | 20.07%±0.52% | 32.43%±0.70% | 47.50%±1.04% |         |          |           |
| Dark-brown earths     | 21.91%±0.52% | 35.40%±1.11% | 42.69%±1.40% | 20.23%±0.64% | 31.62%±1.11% | 48.15%±1.24% | 19.93%±0.47% | 31.88%±0.88% | 48.19%±1.19% |         |          |           |
| Cinnamon soils        | 21.53%±0.61% | 35.58%±0.96% | 42.89%±1.29% | 20.01%±0.57% | 32.30%±0.79% | 47.69%±0.99% | 19.63%±0.59% | 32.60%±0.72% | 47.77%±0.94% |         |          |           |
| Grey-cinnamon soils   | 21.68%±0.41% | 35.00%±1.21% | 43.32%±1.35% | 20.32%±0.78% | 31.27%±1.57% | 48.41%±1.39% | 19.78%±0.63% | 32.32%±1.00% | 47.90%±1.29% |         |          |           |
| Chernozems            | 21.85%±0.48% | 35.44%±0.45% | 42.71%±0.85% | 19.50%±0.64% | 31.45%±0.72% | 49.05%±0.96% | 19.00%±0.54% | 31.21%±0.83% | 49.78%±1.04% |         |          |           |
| Skeletal soils        | 21.90%±0.28% | 36.17%±0.36% | 41.93%±0.39% | 19.64%±0.24% | 31.74%±0.28% | 48.62%±0.25% | 20.11%±0.20% | 32.41%±0.36% | 47.48%±0.49% |         |          |           |
| Meadow soils          | 20.72%±0.86% | 34.59%±1.08% | 44.69%±1.74% | 19.20%±0.89% | 31.56%±0.89% | 49.23%±1.27% | 18.66%±0.80% | 31.68%±0.89% | 49.67%±1.30% |         |          |           |
| Mountain meadow soils | 22.27%±0.58% | 35.50%±0.93% | 42.23%±1.40% | 19.90%±0.37% | 30.49%±0.64% | 49.61%±0.87% | 19.57%±0.27% | 30.11%±0.31% | 50.32%±0.51% |         |          |           |
| Bog soils             | 21.80%±0.60% | 35.45%±1.09% | 42.75%±1.45% | 20.26%±0.63% | 32.35%±0.95% | 47.39%±1.21% | 19.93%±0.55% | 32.33%±0.95% | 47.73%±1.17% |         |          |           |
| Peat soils            | 21.70%±0.59% | 35.47%±0.95% | 42.83%±1.36% | 20.31%±0.61% | 32.67%±1.01% | 47.02%±1.29% | 19.94%±0.50% | 32.76%±0.96% | 47.30%±1.18% |         |          |           |
| Felty soils           | 20.85%±0.55% | 34.55%±0.90% | 44.60%±1.29% | 18.97%±0.52% | 30.57%±0.73% | 50.46%±1.09% | 18.88%±0.49% | 30.56%±0.70% | 50.56%±1.02% |         |          |           |
| Dark felty soils      | 21.85%±0.76% | 35.64%±1.08% | 42.51%±1.65% | 20.23%±0.84% | 31.23%±1.10% | 48.74%±1.59% | 19.70%±0.69% | 31.40%±1.14% | 48.90%±1.61% |         |          |           |
| Frigid frozen soils   | 21.62%±0.77% | 34.96%±1.20% | 43.42%±1.72% | 19.84%±0.87% | 30.60%±1.03% | 49.56%±1.32% | 19.47%±0.63% | 30.88%±0.95% | 49.65%±1.36% |         |          |           |

**Table S7.** Synthesis of soil organic carbon density in the three soil layers in Zoige wetland from this study and previous investigations.

| Soil layer (cm) | Period    | Study area                | SOC density (kg C m <sup>-2</sup> ) | References       |
|-----------------|-----------|---------------------------|-------------------------------------|------------------|
| 0-20            | 2020      | Zoige alpine wetland      | 10.69                               | Our study        |
| 0-20            | 2000      |                           | 9.11                                |                  |
| 0-20            | 1985      |                           | 8.86                                |                  |
| 0-20            | -         |                           | 10.15                               |                  |
| 0-20            | -         |                           | 12.40                               |                  |
| 0-20            | 2014      |                           | 6.97                                |                  |
| 0-10            | 2020      |                           | 25.92                               |                  |
| 20-50           | 2020      | Zoige alpine wetland      | 17.49                               | Our study        |
| 20-50           | 2000      |                           | 14.40                               |                  |
| 20-50           | 1985      |                           | 14.31                               |                  |
| 20-50           | -         |                           | 13.38                               |                  |
| 20-50           | -         |                           | 11.96                               |                  |
| 20-50           | 2014      |                           | 7.79                                |                  |
| 50-100          | 2020      | Zoige alpine wetland      | 21.39                               | Our study        |
| 50-100          | 1985      |                           | 22.23                               |                  |
| 50-100          | 2000      |                           | 22.39                               |                  |
| 50-100          | -         |                           | 17.04                               |                  |
| 50-100          | -         |                           | 14.87                               |                  |
| 50-100          | 2014      |                           | 9.07                                |                  |
| 0-100           | 1990      |                           | 54.01                               |                  |
| 0-40            | 2015~2019 | Coastal wetlands of China | 2.24~12.61                          | Xia et al., 2022 |
| 40-100          | 2015~2019 |                           | 2.18~18.91                          | Xia et al., 2022 |

## Reference

- Mu, H., Li, X., Wen, Y., Huang, J., Du, P., Su, W., Miao, S., Geng, M., 2022. A global record of annual terrestrial Human Footprint dataset from 2000 to 2018. *Sci Data* 9, 176. <https://doi.org/10.1038/s41597-022-01284-8>
- Peng, S., Ding, Y., Li, Z., 2019. High-spatial-resolution monthly temperature and precipitation dataset for China for 1901-2017. *Earth System Science Data Discussions* 1–23. <https://doi.org/10.5194/essd-2019-83>
